# Supplementary material for: Factors impacting new bone formation in transcrestal sinus floor elevation followed by implant placement: a cross-sectional study
Source: BMC Oral Health. 2022 Jul 31;22:319. doi: 10.1186/s12903-022-02352-6 (PMC9341123; doi:10.1186/s12903-022-02352-6)
Supplement: Supplementary file 1 — Additional file 1. Stata for survival rate during the healing period. [file 12903_2022_2352_MOESM1_ESM.xlsx]

## Sheet: Sheet5
survival during the healing period	IPL	perforatioon	bone grafting	implant shape	IPL
1	2.1	0	0	0	0
0	2.7	0	0	0	0
0	2.5	0	0	0	0
0	3.3	0	0	0	1
0	3.3	0	0	0	1
0	0.9	0	0	1	0
0	1.1	0	0	0	0
0	1.7	0	0	0	0
0	1.8	0	0	0	0
0	3.3	1	0	0	1
0	3.2	0	0	0	1
0	1.6	0	0	0	0
0	1	0	0	0	0
0	4.6	0	1	0	1
0	0.7	0	0	0	0
0	3.8	1	0	0	1
0	2.2	0	0	1	0
0	2	1	0	0	0
0	1.8	0	0	1	0
0	3.8	0	0	0	1
0	4	0	0	0	1
0	0.7	0	0	0	0
0	3	0	0	0	1
0	4	0	0	0	1
0	2.5	0	0	0	0
0	4.3	0	0	0	1
1	4.5	1	0	0	1
0	1.5	0	0	0	0
0	3	0	0	0	1
0	3.6	0	0	0	1
0	4.5	0	0	0	1
0	4.7	0	0	0	1
0	4.3	0	0	0	1
0	1.7	0	0	0	0
0	4.5	0	1	0	1
0	4	0	0	0	1
0	4.1	0	0	0	1
0	1	0	0	0	0
0	4.5	0	0	0	1
0	2.5	0	0	0	0
0	0.8	0	0	0	0
0	2.9	0	0	0	0
0	4.1	0	1	0	1
0	2.9	0	0	0	0
0	1.3	0	0	1	0
0	4	1	1	0	1
0	3.5	0	0	0	1
0	1.7	0	0	0	0
0	0.5	0	0	0	0
0	3.4	0	1	0	1
0	3.5	0	0	0	1
0	2.2	0	0	0	0
0	3.7	0	0	0	1
0	4.8	0	1	0	1
0	3	0	0	1	1
1	4.2	0	1	0	1
0	4.3	0	0	0	1
0	3.3	1	0	0	1
0	3.6	0	0	0	1
0	1.8	0	0	0	0
0	0.6	1	0	0	0
0	2.1	0	0	0	0
0	4.8	0	1	0	1
0	2.9	0	0	0	0
0	2.2	0	0	0	0
0	3.5	0	0	0	1
0	4.7	0	0	0	1
0	3.8	1	0	0	1
0	4.3	0	0	0	1
0	3.8	0	0	0	1
0	3.9	0	0	0	1
0	3.5	0	0	0	1
0	1.8	0	0	1	0
0	2.5	0	0	1	0
0	3.8	0	0	0	1
0	2.1	0	0	0	0
0	2.8	0	0	1	0
0	3.7	0	0	1	1
0	0.5	0	0	1	0
0	0.8	0	0	1	0
0	3.5	1	0	0	1
0	0.7	0	0	0	0
0	0.9	0	0	0	0
0	4.8	0	1	0	1
1	4.5	0	1	0	1
0	3.5	0	1	0	1
0	1.3	0	0	0	0
0	2.2	0	0	0	0
0	3.6	0	0	0	1
0	3.9	0	0	0	1
0	1.8	0	0	0	0
0	3.7	0	0	0	1
0	3.8	0	0	0	1
0	2.9	0	0	0	0
0	2.8	1	1	0	0
0	1.3	0	0	0	0
0	2.2	0	0	0	0
0	0.3	0	0	1	0
0	0.5	0	0	0	0
0	0.3	0	0	0	0
0	0.9	0	0	1	0
0	3.2	0	0	0	1
0	2.9	0	0	0	0
0	0.8	1	0	0	0
0	2.2	0	1	0	0
0	2.3	0	1	0	0
0	2.9	0	0	0	0
0	1.9	0	0	1	0
0	1.4	0	0	0	0
0	2.1	1	0	0	0
0	4.7	0	0	1	1
0	2.8	0	0	1	0
0	2.8	0	0	1	0
0	2.9	0	0	0	0
0	2.8	0	0	0	0
0	2.9	0	0	0	0
0	2.3	0	0	1	0
0	0.3	0	1	1	0
0	1.8	0	0	1	0
0	2.6	0	0	0	0
0	1.9	0	0	0	0
0	3.5	0	1	0	1
0	3.3	1	0	0	1
0	1.1	0	0	0	0
0	1.9	0	0	0	0
0	2.4	0	0	0	0
0	4.7	0	1	0	1
0	2.5	0	0	0	0
0	0.7	0	0	0	0
0	0.5	0	0	0	0
0	0.3	0	0	0	0
0	1.2	0	0	0	0
0	0.8	0	0	1	0
0	1.4	0	0	1	0
0	1.9	1	0	0	0
0	1.9	0	0	0	0
0	2.8	0	0	0	0
0	2.2	0	0	0	0
0	2.3	0	0	0	0
0	2.7	0	0	0	0
0	2.8	0	0	0	0
0	2.4	0	0	0	0
1	4.7	0	1	0	1
0	4.7	0	1	0	1
0	3.7	0	1	0	1
0	4.3	0	1	0	1
0	1.9	0	0	0	0
0	1.8	1	0	0	0
0	4.2	0	0	0	1
0	2.8	0	0	0	0
0	0.4	0	0	0	0
0	1.3	0	0	0	0
0	3.4	0	0	0	1
0	0.4	0	1	0	0
0	1.3	0	0	0	0
0	2.8	0	1	0	0
0	3.9	0	1	0	1
1	0.3	0	0	0	0
0	4.8	0	1	0	1
0	3.7	0	1	0	1
0	3.9	0	1	0	1
0	3.3	0	1	0	1
0	2.3	0	0	0	0
0	2	0	0	0	0
0	3.5	0	0	0	1
0	0.4	0	0	0	0
0	4.1	0	0	1	1
0	0.9	0	0	0	0
0	3.6	0	1	0	1
0	2.8	1	0	0	0
0	3.8	0	0	0	1
0	1.7	0	0	0	0
0	3.9	0	1	0	1
0	3.4	1	0	0	1
0	3.7	0	0	0	1
0	0.8	0	0	0	0
0	1.9	0	1	1	0
0	2.7	0	0	0	0
0	1.6	0	0	0	0
0	2.5	0	0	0	0
0	2.8	0	0	0	0
0	2.8	0	0	0	0
0	3.9	0	0	0	1
0	2.7	0	1	0	0
0	2.4	0	0	0	0
0	1.8	0	0	0	0
0	2.9	0	0	0	0
0	2.8	0	0	0	0
0	0.6	0	0	0	0
0	2.1	0	0	0	0
0	2.3	0	0	0	0
0	2.2	1	0	0	0
0	1.3	0	0	0	0
0	2.6	0	1	0	0
0	3.2	0	0	0	1
0	3.7	0	0	0	1
0	2.9	0	0	0	0
0	3.2	0	0	0	1
0	2.5	0	0	0	0
0	1.1	0	0	0	0
0	1.5	1	0	0	0
0	3.2	0	0	0	1
0	2.9	0	0	0	0
0	2.4	1	0	0	0
0	2.6	1	0	0	0
0	1.5	0	0	0	0
0	2.1	0	0	0	0
0	1.9	0	1	0	0
0	1.4	0	1	0	0
0	2.6	0	1	0	0
0	1.2	0	0	0	0
0	3.9	0	0	0	1
0	1.5	0	0	0	0
0	1.8	0	0	0	0
0	3.6	0	0	0	1
0	2.1	0	0	0	0
0	2.1	0	0	0	0
0	1.7	0	0	0	0
1	3.3	1	0	0	1
1	4.2	0	0	0	1
0	2.7	0	0	0	0
0	3.6	0	0	0	1
0	2.9	0	0	0	0
0	2	0	1	0	0
0	4.1	0	0	0	1
0	1.8	0	0	0	0
0	0.3	0	0	0	0
0	1.2	0	0	0	0
0	2.6	0	0	0	0
0	3.2	0	0	0	1
0	3.3	0	1	0	1
0	2.4	0	0	0	0
0	1.9	0	0	0	0
0	2.2	0	0	0	0
0	2.5	1	0	0	0
0	1.2	0	0	0	0
0	1.6	0	1	0	0
0	1.5	1	1	0	0
0	0.6	0	0	0	0
0	3.4	0	0	0	1
0	1.6	0	0	0	0
0	3.5	0	1	0	1
0	4.8	0	0	0	1
0	3.2	0	0	0	1
0	1.9	0	0	0	0
0	2.3	0	0	0	0
0	2.1	1	0	0	0
0	4.5	0	0	0	1
0	2.9	0	0	0	0
0	1.9	0	0	0	0
0	0.8	0	0	0	0
0	2.2	0	0	0	0
0	1	0	0	0	0
0	4.2	0	0	0	1
0	2.7	0	0	0	0
0	2.8	0	0	0	0
0	0.3	0	0	0	0
0	2.2	0	0	0	0
0	2	1	0	0	0
0	1.5	0	0	1	0
0	1.6	0	0	0	0
0	0.9	0	0	0	0
0	3.4	0	0	0	1
0	3.5	0	0	1	1
0	0.3	0	0	1	0
0	4.8	0	0	0	1
0	4.8	0	1	0	1
0	0.3	0	0	0	0
0	2.2	0	0	0	0
0	3.2	1	0	0	1
0	2.5	0	0	0	0
0	1.8	0	0	0	0
0	2.6	0	0	0	0
0	1.5	0	0	0	0
0	1.6	0	0	0	0
0	1.9	0	0	0	0
0	3.6	0	0	0	1
0	4.1	0	0	0	1
0	1.8	0	0	0	0
0	3.7	0	0	1	1
0	2.6	0	0	1	0
0	4.9	0	0	1	1
0	3.2	0	0	1	1
0	3.6	0	0	0	1
0	0.3	0	0	0	0
0	2	0	0	0	0
0	4.6	0	0	1	1
0	4.9	0	0	1	1
0	0.6	0	1	0	0
0	2.5	0	1	0	0
0	3.2	0	0	0	1
0	1.9	1	0	0	0
0	3.9	0	0	0	1
0	4.3	0	0	0	1
0	3.5	1	0	0	1
0	3.6	1	0	0	1
0	2.4	0	0	0	0
0	2.5	0	0	0	0
0	3.4	0	0	0	1
0	4.9	0	0	0	1
0	1.6	0	0	1	0
0	2.5	0	0	0	0
0	2.6	1	0	0	0
0	2.6	0	0	0	0
0	1.6	0	0	0	0
0	3.5	0	0	0	1
0	0.9	0	0	1	0
0	4.8	0	0	1	1
0	4.9	0	0	1	1
0	1.1	0	0	0	0
0	4.6	0	0	1	1
0	3.5	0	0	0	1
0	3.6	0	0	0	1
0	1.2	0	0	1	0
1	3.1	0	0	1	1
0	2.9	0	0	1	0
0	2.7	0	0	1	0
0	4.7	0	0	1	1
0	2.1	0	0	0	0
0	3.5	0	0	1	1
0	2.3	0	1	1	0
0	4.3	0	0	1	1
0	1.3	0	1	1	0
0	2.7	1	0	1	0
0	0.5	0	0	1	0
0	4.9	1	0	1	1
0	4.9	0	1	0	1
0	3.5	0	0	1	1
0	2.3	1	0	0	0
0	0.4	0	0	1	0
0	3.9	0	0	0	1
1	4.8	0	0	1	1
0	2.6	0	0	0	0
0	4.6	0	0	0	1
0	0.5	0	0	0	0
0	2.2	0	0	0	0
0	2.5	0	0	0	0
0	3.9	1	1	0	1
0	4.6	0	0	0	1
0	1.2	0	0	0	0
0	1.2	0	0	1	0
0	4.3	0	0	0	1
0	3.5	0	0	0	1
0	2.8	0	0	0	0
0	1.3	0	1	1	0
0	2.3	0	0	1	0
0	2.6	0	0	1	0
0	4.6	1	0	1	1
0	4.6	0	0	1	1
0	4.9	0	0	1	1
0	4.8	0	1	1	1
0	3.3	0	0	1	1
0	3.6	0	0	1	1
0	1.7	0	0	1	0
0	3.2	0	0	1	1
0	2.9	0	0	1	0
0	2.4	0	0	1	0
